# Supplementary material for: Fasting impairs type 2 helper T cell infiltration in the lung of an eosinophilic asthma mouse model
Source: PubMed Central journal article supplement (PMC8409288; doi:10.1002/2211-5463.13268), 2021-08-20
Supplement: FEB4-11-2619-s002.pdf [file FEB4-11-2619-s002.pdf]

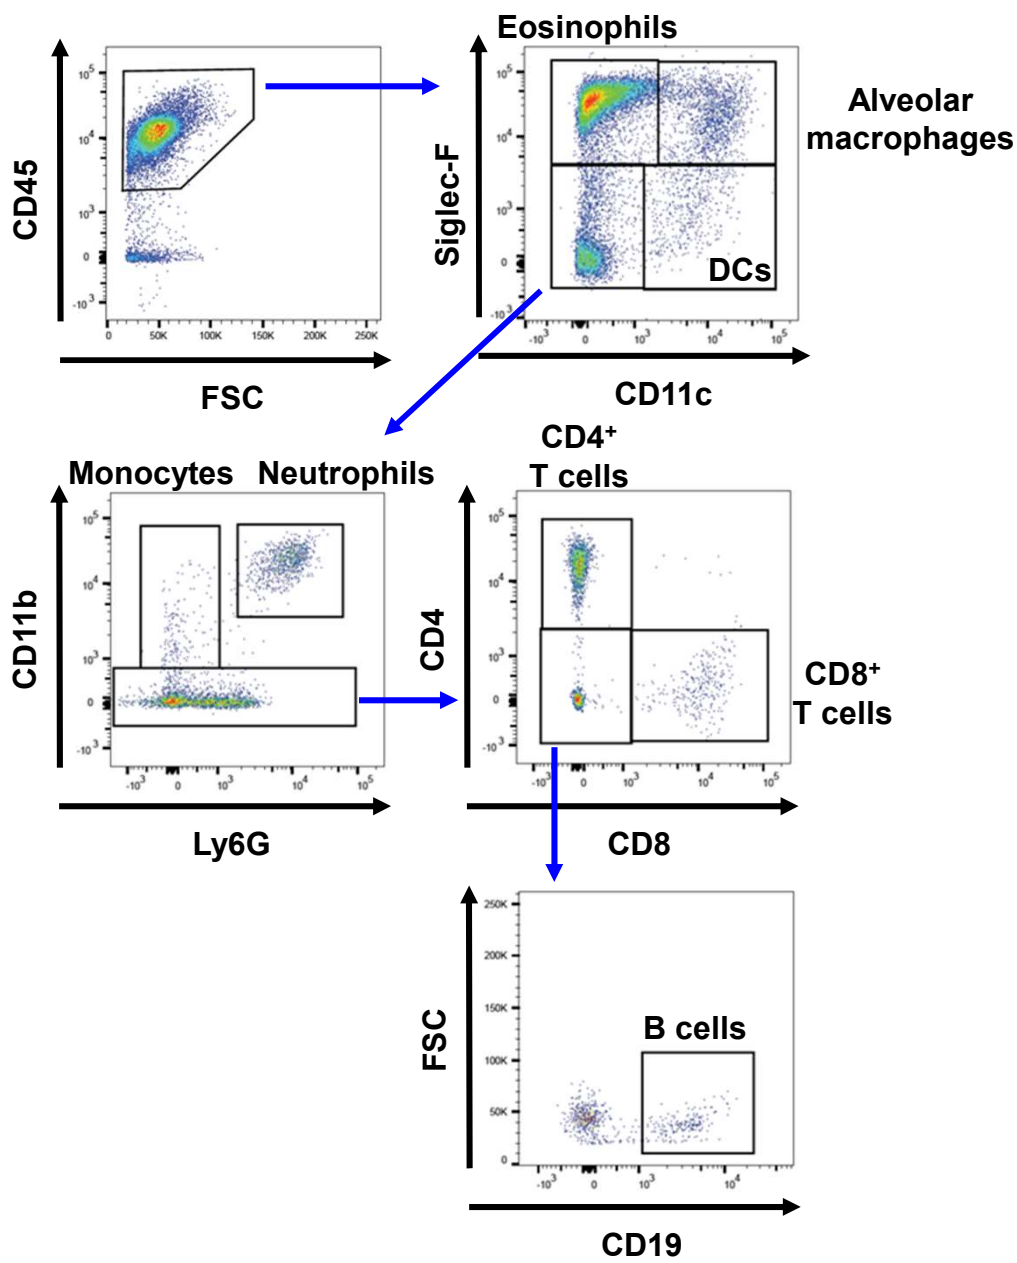

Supplementary Figure 1
